# Supplementary material
Source: HighWire-hosted journal article supplement (https://drc.bmj.com/content/8/1/e001424)
Supplement: inline-supplementary-material-1 [file inline-supplementary-material-1.xlsx]

## Sheet: Definitiva
Sexo ( 0=varon)	Fecha nacimiento	T evolucion diabetes (extracción)	Estadio puberal	Categoroia 1=control, 2 DM, 3 OB	Fecha debut	Cetoacidosis al debut	Edad en años momento extracción	Fecha analítica	IMC	IMC ( Z score)	Peso	Peso ( Z score)	Talla	Talla ( Z score)	Perímetro abdominal	Per Abd ( Z score)	TA (p<90)	Z score sistólica	Z score diastólica	actígrafo	Hba1c	HbA1c -3	HbA1C -6	Hba1c -9	HbA1c-12	Media de últimos 6 meses	Media de últimos 12 meses	Colesterol total	TG	HDL	LDL	25 (OH) Vitamina D	Microalbuminuria	cociente microalb/creat	Tipo de insulina ( 0=bomba,1= SC)	DTI	UI/kg/día	Estudio genético HLA DQ2	Estudio genetico DQ8	Cribado genética celiaquía	Fondo de ojo	hs-CRP mg/L	Grupo control	nombre control	Codificación	0,normopeso,1 sobrepeso, 2 obesidad	Riesgo cardiovascular 1,2,3	Incremento HbA1c 6m	IMC Z score al debut
0	2003-03-06	2.3863	4	2	2016-11-03	1	16.0778	2019-04-04	19.96	-0.54	59.4	-0.19	172.5	0.27	69	-0.55	107/64	-0.94	-0.18	2018-03-08	7.7	7.6	7.4	7.4	7.1	7.56667	7.44	156	57	44	101	18.5	28.5	10.9	0	56.28	1	1	0	1	0	0.18	3.14	MOS95	DM2*	0	1		-1.67
1	2004-02-04	4.05753	5	2	2014-06-01	1	14.4389	2018-07-12	19.19	-0.55	49.2	-0.13	160.1	0.46	65	-0.36	116/64	0.51	-0.14		6.9	7	7.2	7.5	7	7.03333	7.12	171	60	67	92	23.56	25	14.5	1	19	0.38	1	0	1	0	0.8	0.14	MOS88	DM30	0	1		-1.11
0	2000-05-26	6.92603	5	2	2011-12-19	1	18.5861	2018-12-27	20.2	-0.16	67.4	1.15	182.3	2.13	72	-0.11	124/85	0.5	1.5	2018-12-27	6.9	7	6.5	6.7	8.1	6.8	7.04	151	51	42	99	33.67	2.5	1.7	0	51	0.75	1	1	1	0	0.31	0.75	MOS70	DM 46	0	1		-0.17
0	2002-08-23	2.35068	5	2	2015-12-01	1	15.6556	2018-04-19	27.2	2.09	86.4	2.62	178.5	1.27	85	1.8	128/70	0.86	0.26		8.9	9	10.3	8.2	7.3	9.4	8.74	167	85	42	108	20.56	3.8	1.9	1	63	0.72	1	0	1	0	0.95	0.15	Mos124	DM11	2	1
0	2003-07-24	2.88767	5	2	2016-05-05	0	15.7083	2019-04-09	26.82	1.97	80	1.97	172.7	0.43	92	2.84	122/64	0.47	-0.17		7.4	7	7.2	7.2	6.4	7.2	7.04	169	83	53	99	17.2	3	1	0	25	0.31	0	0	0	0	3.26	2.51	M1410	DM31*	1	3		0.49
0	2005-03-18	5.39178	2	2	2012-10-09	1	13.025	2018-03-27	16.4	-1.06	36.6	-0.81	149.2	-0.52	59	-1.47	120/58	-1.18	-0.34	2018-03-27	7.4	7.6	7.8	7.2	7	7.6	7.4	184	41	64	112	27.49	1.9	1.8	1	28	0.8	1	1	1	0	0.16	0.03	M1333	DM5	0	1		-1.44
1	2007-01-08	4.20548	3	2	2014-01-07	0	11.2611	2018-04-12	18.6	-0.06	39.7	0.27	145.8	0.24	64	-0.1	76/47	-2.7	-1.4		7.1	8.2	7.9	7.8	8.2	7.73333	7.84	156	47	69	78	23.42	30.9	22.7	0	24.58	0.61	1	1	1	0	4.37	3.56	MOS7	DM8	0	3		-0.45
1	2002-04-03	5.99726	5	2	2012-02-16	0	15.95	2018-03-15	26.2	1.76	76	3.04	170.6	1.89	83	3.23	115/82	-0.02	1.23	2018-03-15	10.7	9.9	9.2	8.9	9.1	9.93333	9.56	158	79	64	78	14.41	3.5	3.4	1	76	1				0	5.28	0.27	M1350	DM3	1	3		2.69
1	2012-06-21	0.953425	1	2	2017-11-20	1	6.38056	2018-11-08	14.7	-0.73	19.1	-0.72	113.7	-0.58	50	-0.88	86/62	-0.78	0.55	2018-11-08	7.1	6.7	6.6	7.6	6.8	6.8	6.96	181	44	93	79	27.6	13.2	40	1	15.5	0.8	0	1	1	0	3.05	0.63	M176	DM38	0	3		-0.42
0	2007-01-17	3.08493	2	2	2015-10-13	0	11.8667	2018-11-29	21.38	0.85	56.1	2.51	162	2.61	63	0.8	105/58	-0.6	-0.63	2018-11-29	6.6	6.6	7.6	6.8	7.6	6.93333	7.04	141	31	71	64	16.35	4.3	5.2	1	63	1.18	1	0	1	0	0.71	2.84	MOS47	DM43	0	1		0.51
1	2011-08-26	4.55342	1	2	2013-08-23	1	6.60833	2018-04-05	18.7	1.32	25.6	0.88	117	-0.17	62	1.09	100/59	0.44	0.21	2018-04-05	9.3	9.9	10.9	10.7	9.9	10.0333	10.14	183	45	54	120	18.28	3.5	3.8	1	28	1.09	1	1	1	0	3.13	0.38	M21	DM6	0	3
1	2011-03-01	2.87397	1	2	2015-04-06	0	7.01111	2018-03-05	16.7	0.17	28.3	1.19	130	2	58	0.35	99/41	-0.14	-1.72	2018-03-08	7.9	8	8.3	8.4	8.1	8.06667	8.14	126	34	53	66	27.27	6.6	7.2	0	17.97	0.63	1	0	1	0	2.33	2.39	M108	DM1	0	2		3.31
0	2006-07-10	0.567123	2	2	2018-01-05	1	12.0611	2018-08-02	14.2	-1.64	32.3	-0.93	150.4	0.54	55	-1.81	101/53	-0.65	-0.86	2018-12-20	7.3	7.3	7.1			7.23333	7.23333	194	60	70	112	30.71	8.1	5.2	1	11.5	0.35				0	0.7	0.05	MOS2	DM 34	0	1		-1.62
0	2000-11-29	5.96712	5	2	2012-04-08	0	17.4083	2018-04-26	17.9	-1.41	57.9	-0.84	179.6	0.91	71	-0.26	114/70	-0.74	-0.02	NO PARTICIPA	7.4	7.6	8.4	7.8	7.7	7.8	7.78	159	75	50	94	19.82	3.5	1.4	1	46	0.8	1	1	1	0	1.66	0.74	Mos159	DM14	0	2		-1.28
0	2001-06-14	8.69041	5	2	2009-06-20		16.8278	2018-04-12	17.5	-1.51	52.7	-1.25	173.5	0.05	70	-0.41	121/81	0.22	1.16		7.2	7.4	7.6	7.9	8.4	7.4	7.7	130	30	44	80	18.07	4.9	1.9	1	58	1.3	1	1	1	0	5.7	0.52	Mos145	DM10	0	3
0	2002-04-19	4.29589	5	2	2014-01-16	0	16.0972	2018-05-24	23.9	0.77	77.5	1.56	180.7	1.45	82	1.36	112/73	-0.77	0.44	2018-05-24	7	8	13.9	11.2	10.4	9.63333	10.1	119	63	31	75	18.84	7.9	11	1	63	0.79	1	0	1	0	6.79	0.53	Mos-87	DM24	0	3		0.06
0	2001-01-02	8.70685	5	2	2010-02-01		17.9083	2018-11-29	19.2	-1	53.4	-1.39	166.4	-1.51	67	-0.85	111/66	-0.49	-0.19		7.2	7.8	8.9	9.8	8.6	7.96667	8.46	125	59	51	62	30.88	1.8	3.9	1	38	0.71	1	0	1	0	0.99	0.19	Mos106	DM26	0	1
0	2005-06-06	14.611	5	2	2003-10-09	0	13.1556	2018-08-02	18.4	-0.28	51.8	0.89	165.8	1.58	72	0.31	119/79	0.57	1.22		9.9	11.3	10.5	13.6	10	10.5667	11.06	158	135	54	77	16.39	10.4	5.4	1	48	0.92	1	0	1	0	0.79	0.32	M1321	DM 33	0	1		2.16
0	2003-07-05	0.736986	2	2	2017-06-28	0	14.7278	2018-03-27	18	-0.79	45	-0.88	156.5	-0.96	68	-0.7	111/73	0.05	0.89	2018-03-27	7.1	7.4	6.9			7.13333	7.13333	171	54	50	110	14.6	1.5	2.7	1	23	0.5	0	1	1	0	0.02	0.15	M1329	DM4*	0	1	0.2
0	2004-09-20	6.81644	5	2	2011-11-20		14.0778	2018-10-18	18.4	-0.59	51.4	0.18	166.9	0.75	66	-0.82	114/78	0.05	1.16		8.2	8.1	10.3	8.5	11.2	8.86667	9.26	143	53	51	85	34.05	5.3	3.4	1	57	1.1	1	1	1	0	1.41	1.52	M1400	DM37	0	2	-2.1
1	2010-11-28	2.20548	1	2	2016-04-03	1	7.58333	2018-06-28	17.1	0.14	30.9	1.28	134.4	2.12	56	-0.15	92/67	-0.93	0.58		8.4	7.6	8.6	9.1	8.7	8.2	8.48	180	49	72	98	19.8	12.5	19.5	1	26	0.8	0	0	0	0	5.77	0.8	M110	DM 27	0	3	-0.2	-1.81
0	2007-01-29	3.77534	2	2	2014-07-24	1	11.3139	2018-05-22	16.9	-0.3	42	0.87	153.5	1.81	67	-0.06	98/64	-1.02	-0.01		6.5	6.5	7.3	8	6.8	6.76667	7.02	171	65	73	85	20.26	5.6	8.6	0	33.3	0.84	1	0	1	0	2.36	0.11	MOS-52	DM23	0	2	-0.8	-1.1
0	2009-10-21	3.21644	1	2	2016-01-12	0	9.48611	2019-04-16	18.57	0.29	32.6	0.47	132.5	-0.31	66	0.41	96/71	-0.42	0.93		7.3	7.4	7.3	8	7.3	7.33333	7.46	135	49	71	54	23.2		3	0	22	0.72	1	0	1	0	0.85	0.1	M34	DM18*	0	1	0	0.09
0	1999-09-23	4.18082	5	2	2014-02-14	0	18.6306	2018-05-10	19.14	-1.05	61	-0.61	178.5	0.48	72	-0.11	119/78	-0.36	0.37		12.2	14	10.6	10	10.3	12.2667	11.42	170	53	53	106	15.95	9.4	2.7	1	88	1.4	1	0	1	0	0.67	1.6	M1363	DM20	0	1	1.6	-1.48
1	2002-02-09	4.67397	5	2	2014-06-30	1	17.1306	2019-03-26	25.3	1.05	65.6	1.86	160.8	0	77	2.03	117/69	0.21	0.34	2018-04-19	6.5	6	6.3	6.3	7	6.26667	6.42	120	45	59	52	13.9	28.4	11.9	0	61.5	0.7				0	2.74	0.28	M1453	DM13*	0	2	0.2	-1.35
0	2002-09-29	5.87397	5	2	2012-09-29	0	15.9556	2018-09-13	23.3	0.64	70.3	0.9	173.8	0.45	74.5	0.26	115/62	-0.24	-0.38		9.3	13.4	10.4	11	10.8	11.0333	10.98	165	86	63	85	41.08			1	75	1.08	1	1	1	0	2.81	0.22	Mos182	DM36	0	2	-1.1
0	2008-04-08	8.61096	2	2	2009-08-10	1	10.0694	2018-05-03	17.2	-0.41	34.3	0.4	141.2	0.76	63	-0.2	101/66	-0.3	0.33	2018-05-03	7.2	7.3	7.2	8.4	8.5	7.23333	7.72	162	71	61	69	15.27	1	2	1	25	0.76	0	0	0	0	0.02	0.01	Mos188	DM19	0	1	0
1	2011-06-16	4.92329	1	2	2013-04-15	1	6.82222	2018-04-12	16.9	0.31	27	1.04	126.3	1.48	59.5	0.64	90/62	-0.87	0.27	2018-04-12	7.5	7.5	7.7	8.4	8.5	7.56667	7.92	163	49	58	95	26.35	1	1	0	16.3	0.6	1	1	1	0	1.77	0.73	M922	DM9	0	2	-0.2	-0.03
1	2000-01-04	15.2767	5	2	2003-07-01	1	18.9806	2018-12-27	29.37	2.54	69.2	2.34	153.5	-1.36	93	5.22	117/76	0.88	1.15	2018-12-27	9.8	8.3	9.1	8.9	8.7	9.06667	8.96	195	68	63	118	15.27			1	57	0.82	0	0	0	0	6.34	0.01	M29	DM45	2	3	0.7
1	2011-08-16	4.95068	1	2	2013-07-19	1	6.94444	2018-07-26	14	-1.16	19.9	-0.79	118.9	-0.18	52	-0.7	91/58	-0.47	0.08		8.6	8.7	9.6	8.5	9	8.96667	8.88	198	78	48	134	25.06	2	2.9	1	20	1	1	0	1	0	2.11	1.27	M143	DM32	0	2	-1	-0.99
1	2003-10-06	11.3973	5	2	2006-10-06	1	14.5556	2018-04-26	22.4	1.13	59.8	1.24	157.8	0.04	71	0.83	105/68	-0.48	0.25	2018-04-26	8.2	7.5	7.5	7.7	6.6	7.73333	7.5	210	55	80	119	14.3	3.6	2.9	0	57.99	1.04	0	1	1	0	3.49	0.07	M1455	DM16	0	3	0.7
0	2002-03-01	0.586301	5	2	2018-04-18	1	16.725	2018-11-22	21.6	-0.22	62.5	-0.44	170.5	-0.52	74	0.18	125/74	0.77	0.65		6	5.9	6			5.96667	5.96667	128	50	40	78	21.24	5.4	3.4	1	17	0.28	1	1	1	0	1.33	2.13	Mos185	DM41	0	2	0	-2.3
0	2004-12-20	1.13425	4	2	2017-05-11	0	13.5417	2018-07-05	18.9	-0.31	48.7	0.27	160.3	0.47	76	0.69	100/77	-1.06	1.15		7.6	6.6	6.8	6.1		7	6.775	159	77	52	92	20.52	1	1	1	44	0.9	1	0	1	0	0.98	0.15	M1320	DM29	0	1	0.8	0.92
1	2000-04-11	4.83836	5	2	2013-10-10	0	18.4028	2018-09-06	22.5	0.35	59.8	0.85	162.7	0.25	73	1.23	120/76	0.8	0.93		7.9	8.1	8.3	8.2	8.3	8.1	8.16	188	59	63	113	32.7	1.3	3.8	1	15	0.87	0	0	0	0	3.99	0.99	MU188	DM35	0	3	-0.4	0.2
0	2004-04-15	12.3973	4	2	2005-10-01		14.0306	2018-04-26	23.2	1.09	53.5	0.45	151.6	-1.06	80	1.15	108/72	-0.04	0.88	2018-04-26	10.9	12.9	11.7			11.8333	11.8333	188	85	45	126	14.68	19.3	16.8	1	55	1.02	0	1	1	0	3.6	0.26	M1334	DM15	0	3	-0.8
1	2006-11-18	5.5726	5	2	2013-04-19	0	12.0694	2018-12-13	26.98	2.4	78.9	5.01	171.1	3.41	91	4.49	111/53	-0.16	-1.23		7.5	7.2	7.2	8.6	8.4	7.3	7.78	157	58	49	96	20.28	4.5	6.4	0	87.6	1.1	0	1	1	0	4.36	0.95	MOS63	DM44	2	3	0.3
1	2007-10-15	5.57808	4	2	2012-10-05	1	10.6278	2018-05-31	21.6	1.2	54.7	2.83	159.1	2.9	77	1.6	110/70	0.1	0.49	2018-05-31	7.2	6.7	7.3	7.6	7.6	7.06667	7.28	156	61	55	89	18.05	7.9	8.9	0	47.23	0.9	1	0	1	0	8.37	1.16	Mos56	DM25	0	3	-0.1
1	2003-05-04	5.10411	5	2	2013-02-21	1	14.9722	2018-04-24	17.9	-0.7	52.7	0.11	166.6	1.39	71	0.83	100/70	-1.27	0.25	2018-04-10	6.6	7.1	7.2	6.8	7	6.96667	6.94	170	55	77	82	21.65	34.3	26.2	0	45.65	0.84	0	1	1	0	0.97	0.08	M-1439	DM7	0	1	-0.6	-1.39
0	2005-09-20	3.33699	2	2	2014-12-01	1	12.5806	2018-04-19	15.6	-1.24	36.8	-0.57	153.2	0.52	63	-0.8	113/65	0.36	0.16		6.6	7	7.3	6.9	7.4	6.96667	7.04	170	53	72	87	27.65	0.5	0.5	0	32.9	0.96	1	1	1	0	0.11	0.04	MOS-51	DM12*	0	1	-0.7
1	2011-08-02	1.99178	1	2	2016-11-01	0	7.26667	2018-11-08	17.3	0.35	28.8	1.07	129	1.45	59	0.49	111/72	1.07	1.14	2018-11-08	6.5	6.6	6.9	6.9	7.1	6.66667	6.8	174	34	73	94	35.6	5.8	5.4	0	16	0.63	1	1	1	0	2.44	0.24	M169	DM39	0	2	-0.4	0.31
0	2007-06-22	2.93425	2	2	2015-05-25	1	10.9	2018-05-16	17	-0.51	41	1	154.8	2.46	67	0.07	119/62	0.92	-0.22		8.1	8.5	9.1	11.5	10.4	8.56667	9.52	137	39	60	69	18.05	9.1	8.9	1	29	0.72	1	0	1	0	1.44	0.63	MOS39	DM22	0	2	-1	1.05
1	2008-08-27	1.10959	1	2	2017-10-14	1	10.2556	2018-11-29	19.4	0.44	39.4	0.87	142.5	0.67	68	0.59	103/63	-0.08	0.13		7.1	6.5	7.2	6.6		6.93333	6.85	156	44	58	89	21.89	9.8	18.1	1	29	0.76	1	1	1	0	1.88	0.75	MOS23	DM42	0	2	-0.1	1.03
0	2007-07-12	0.460274	2	2	2018-06-04	1	11.3611	2018-11-22	17.8	-0.3	41	0.68	151.5	1.41	64.5	-0.39	112/52	0.35	-0.49		6.3	6.2	6.6			6.36667	6.36667	134	61	53	69	28.45			1	28	0.68	0	0	0	0	0.58	1.99	MOS6	DM40	0	1	-0.3	-1.26
0	2013-03-20	2.43836	1	2	2016-09-17	0	5.96389	2019-03-07	14.2	-1	18.4	-0.81	113.8	-0.31			90/54	-0.52	-0.11	no PARTICIPA	8	7.2	7.2	8.1	9	7.46667	7.9	133	39	55	70	42	0.3	0	1	12	0.65	1	0	1	0	2.14	0.17	M70	DM49	0	2	0.8	-1.99
0	2008-10-20	0.00547945	1	2	2019-02-13	1	10.3194	2019-02-15	17.55	-0.2	40.2	1.25	150.2	2.06	64	-0.18	115/75	0.69	0.96		12.6					12.6	12.6					20.12			1			1	0	1	0	0.47	0.32	MOS-8	DM50	0	1	12.6	-0.27
1	2011-07-24	13	1	2	2006-01-01	1	7.61667	2019-03-06	20.22	1.59	32	1.5	125.8	0.39	60	0.57	86/68	-1.17	0.86		11.3	12.8				12.05	12.05					18.18	47.1	2	1	24.5	0.83	0	0	0	0	2.19	2.34	M72	DM51	1	2	11.3
1	2006-04-19	2.2274	5	2	2017-01-01	0	12.9583	2019-04-04	18.48	-0.55	50.3	0.66	165	1.83	67	0.15	111/80	-0.11	1.11		6.6	6.1	5.8	6.2		6.16667	6.175	130	77	53	62	9.15	40.5	2	1	27	0.53	1	0	1	0	1.01	0.08	M1439	DM52	0	2	0.8
0	2000-07-06	6.44658	5	2	2012-12-19	0	18.9889	2019-07-02	19.6	-0.89	55.1	-1.23	167.6	-1.32	72	-0.11	107/77	-1.04	0.38		12.3					12.3	12.3	166	212	41	83	19.8	8.6	4.2	1	39	0.7	1	0	1	0	0.44	1.09	MU-118	DM53	0	1	12.3
1	2014-04-21	3.30959	1	2	2016-01-01	0	5.05	2019-05-09	14.75	-0.6	16.8	-0.6	106.7	-0.29	52	-0.47	86/61	-0.52	0.58		6.8	7.1	6.4	7		6.76667	6.825	168	36	65	96	21.2	48.1	1	0	16	0.83				0	0.09	0.1	dm54	DM54	0	1	0.4
0	2007-01-04		1	3			11.1917	2018-03-13	25.02	2.34	48.2	1.91	138.8	-0.62							5.7							197	155	42	124	12.38										8.23716				2	3
0	2003-05-09		1	3			14.8444	2018-03-13	31.1	3.69	85.5	2.89	165.8	0.08	100	4.02	93/63	-1.96	0.22		5.7							136	56	41	84	15.97										1.3154				2	2
0	2002-03-18		5	3			16.025	2018-03-27	32.28	3.85	108.1	4.71	183	1.79	110	5.49	111/77	-0.9	0.76		5.3							157	59	39	166	18.75										2.37452				2	2
0	2006-05-04		2	3			11.9389	2018-04-12	33	4.86	88.7	7.03	164	2.88	112	5.91	124/77	1.13	0.98		4.7							218	129	68	128	17.49										4.60308				2	3
0	2004-04-27		3	3			13.9722	2018-04-17	32.27	4.2	91.3	4.77	168.2	0.99	104	4.47	123/75	0.86	0.89		4.7							126	66	34	79	29.6										2.75466				2	2
0	2001-08-16		5	3			16.8806	2018-07-03	32.26	3.56	93.9	2.94	170.6	-0.34	108	5.2	123/80	0.56	1.17		4.7							142	137	34	81	22.81										0.64255				2	1
1	2005-08-16		2	3			12.6889	2018-04-24	38.33	6.03	91.5	5.64	154.5	0.08	106	6.89	116/72	0.77	0.75		5.2							170	108	44	104	12.69										2.80801				2	2
1	2006-03-27		5	3			12.1389	2018-05-17	28.9	2.98	75.6	4.06	161.5	1.44	101	7.09	125/75	1.45	0.91		5.2							129	55	41	77	18.69										0.711527				2	1
1	2008-05-26		2	3			9.95556	2018-05-10	27.21	3.53	59.6	4.39	148	1.95	86.2	3.24	117/70	1.06	0.65		5.4							163	103	42	100	23.42										3.21362				2	3
0	2003-02-27		4	3			15.2778	2018-06-07	33.93	4.6	103.9	4.45	175	0.97	112.5	5.86	118/80	0.07	1.19		5.5							113	80	36	61	16.62										7.09983				2	3
1	2008-01-14		1	3			10.8861	2018-12-03	29.48	4.05	66.5	4.26	150.2	1.27	97	4.25	109/72	0.25	0.82		5.4							152	70	35	103	16.54										5.53959				2	3
1	2005-03-26		5	3			13.5222	2018-10-04	32.08	4.15	79.7	3.86	157.6	0.09	91	2.67	94/71	-1.54	0.67		4.7							142	55	52	79	22.42										4.96208				2	3
1	2005-10-02		5	3			12.8	2018-07-20	31	3.6	78	4.22	158.5	0.95	88	4.21	105/66	-0.4	0.13		5.1							166	92	32	116	23.8										6.25323				2	3
0	2005-05-31		2	3			13.4167	2018-10-30	34.9	5.15	90.3	5	160.5	0.36	109	5.07	100/63	-1.07	-0.05		5.4							183	64	44	126	12.97										5.7932				2	3
1	2008-04-08		3	3			10.675	2018-12-11	29.73	4.26	68.5	4.91	151.8	1.79	100	4.44	91/69	-1.5	0.42		5.3							142	103	45	76	19.7										6.47347				2	3
0	2009-12-15		1	3			9.00833	2018-12-18	29.9	6.63	57.7	7.66	138.7	3.06	94.5	8.63	107/67	0.26	0.43		4.7							155	83	58	80	16.11										1.96588				2	2
0	2008-07-24		1	3			10.4611	2019-01-10	26.9	3.38	59.2	4.69	148.1	1.77	89	3.31	99/69	-0.73	0.47		5.2							149	187	46	66	11.62										2.84529				2	2
1	2001-09-20		5	3			16.3417	2018-01-23	38.05	5.43	101.1	7.37	163	0.39	120	10.6	106/81	-0.63	1.3		5.6							129	40	42	79	10.1										7.28227				2	3
1	2003-01-25		5	3			15.9722	2019-01-15	50.31	10.4	135.8	10.98	164.3	0.78	129	12.39	122/88	0.86	1.91		5.1							98	93	32	47	9.91										8.74616				2	3
0	2012-02-08		1	3			6.94167	2019-01-17	23.67	3.92	40	3.94	130	1.97	78	4.71	90/62	-1.12	0.17		4.9							98	30	36	56	25.77										2.05112				2	2
1	2007-04-16		1	3			11.0111	2018-04-20	31.54	4.85	75.3	5.59	154.5	2.02	102	4.85	120/63	1.17	-0.08		5.4							150	103	42	87	23.44										3.92174				2	3
0	2008-09-11		2	3			10.3639	2019-01-22	30.52	4.76	76.1	7.69	157.9	3.52	106	5.66	109/72	-0.04	0.56		6.5							207	203	35	131	10.08										2.03				2	2
1	2001-08-15		5	3			17.4417	2019-01-24	30.7	4.85	65.9	5.79	148.6	2.39	88	3.98	117/76	1.05	1.18		5							173	142	30	115	16.45										9.03				2	3
1	2009-01-02		1	3			10.075	2019-01-29	29.84	4.49	65.9	5.24	148.7	1.9	88	3.36	117/76	1.05	1.19									161	127	40	96	15.39										0.52				2	1
0	2005-01-12		2	3			14.0528	2019-01-31	44.17	8.3	131.6	9.05	172.6	1.45	130.5	8.19	114/71	-0.09	0.49									141	78	38	87											6.23				2	3
1	2004-03-05		5	3			14.9056	2019-01-31	31.65	3.94	98.5	6.17	176.4	3.03	99	6.41	131/81	1.4	1.09		5.3							112	30	44	62	20.79										0.86				2	1
1	2003-08-24		5	3			15.4861	2019-02-19	39.33	6.65	117.7	8.6	173	2.42	120	10.6	127/71	1.06	0.19		5.2							144	76	45	84	14.63										7.78				2	3
0	2006-11-27		2	3			12.2472	2019-02-26	29.79	3.63	70	3.91	153.3	0.84	98	4.37	116/75	0.65	1		5.2							164	68	59	91	21.44										0.48				2	1
0	2004-06-11		5	3			14.7083	2019-02-26	38.92	6.48	116.9	6.03	173.3	1.11	121.1	7.13	130/82	1.31	1.42		5.1							180	135	38	115	11.63										0.76				2	1
1	2008-09-09		2	3			10.4944	2019-03-07	28.49	3.83	78.8	6.55	166.3	4.15	97	4.03	105/74	-0.56	0.82		5.1							121	50	44	67	14.4										0.84				2	1
1	2003-09-27		5	3			15.4444	2019-03-07	36.07	5.48	89.7	4.91	157.7	-0.24	96	5.81	116/61	0.53	-0.42		4.8							132	82	44	72	20.15										0.48				2	1
0	2007-02-10		1	3			12.0861	2019-03-11	33.88	5.1	91	7.03	163.9	2.69	115	6.56	108/72	-0.38	0.56		5.3							168	139	47	93											1.91				2	2
1	2006-05-27		4	3			12.8111	2019-03-19	33.59	4.48	88.7	5.48	162.5	1.47	110	8.13	106/66	-0.41	0.06		5.1							129	59	40	77	20.06										2.8				2	2
1	2007-07-13		4	3			11.7028	2019-03-26	30.91	3.91	76	4.72	156.8	1.47	77	1.84	107/79	-0.12	1.36		5.2							136	116	42	71	13.8										0.86				2	1
0	2007-05-25		2	3			11.8694	2019-04-08	37.75	6.54	90.7	7.38	155	1.47	109	5.46	124/68	1.35	0.34		5.3							117	78	47	54	21.1										5				2	3
0	2011-05-05		1	3			7.89722	2019-03-28	24.23	3.4	41.9	3.84	131.5	1.13	80	4.22	103/65	0.13	0.39									139	34	52	80	20										1.5				2	2
1	2005-03-13		5	3			14.0917	2019-04-16	38.42	5.96	100.7	6.28	161.9	0.82	111	7.88	98/71	-1.24	0.48		5.5							122	153	40	51	12.9										2.05				2	2
1	2005-06-04		4	3			13.8917	2019-04-25	37.44	5.6	97.4	5.81	161.3	0.76	114	7.99	108/88	-0.25	2.05		5.3							94	61	30	52	18.6										0.27				2	1
1	2003-10-11		5	3			15.7083	2019-06-26	40.52	7	114.5	8.16	168.1	1.51	125	11.59	109/74	-0.5	0.56		4.7							138	42	41	89	21.9										1				2	2
0	2010-11-14		1	3			8.61389	2019-06-25	26.39	4.03	55.4	5.88	144.9	2.78	89	4.47	98/71	-0.7	0.67		5.3							168	159	47	89	14.7										1.04				2	2
0				1			15		20.78	-0.2	55.9																	139	67.5	30.4	95.1											3.14					3
1				1			14.5		19.81	-0.42	47.6																	183.6	126	52	106.4											0.14					1
0				1			15.5		23.2	0.38	84.2																	129	62.5	56	60.5											0.15					1
0				1			14.5		22.98	0.39	64.1																	113.5	84	26.6	70.1											2.51					2
0				1			13.5		16.98	-0.12	38.2																	154.6	51.1	54.9	89.48											0.03					1
1				1			11.5		18.54	-0.28	40.6																	131	102.8	38.1	72.3											3.56					3
1				1			6.5		14.6	-0.86	21																	169	66	55.3	100.5											0.63					1
1				1			6.5		17.28	0.3	27																	173.7	50.6	75.6	87.98											0.38					1
1				1			7		16.57	-0.01	28																	183	85	39.1	126.9											2.39					2
0				1			12		16.3	-1	35.7																	172.5	114.3	58	91.6											0.05					1
0				1			16		21.11	-0.24	60.3																	131.4	82	42	73											0.74					1
0				1			15.5		20.16	-0.43	56.9																	178	62	64	101.6											0.52					1
0				1			16		23.41	0.39	89																	121	102.5	33	67.5											0.53					1
0				1			17		18.63	-1.1	47.7																	142	56.4	44	86.7											0.19					1
0				1			13		16.57	-1	49.6																	161.5	62.7	41.6	107.36											0.32					1
0				1			14		18.65	-0.72	51.4																	165.2	53	45.5	109.1											0.15					1
0				1			14.5		18.4	-0.8	43.4																	146.3	61	37.4	96.7											1.52					2
1				1			7		17.09	0.2	23																	162.6	65.9	54	95.42											0.8					1
0				1			11.5		17.8	-0.51	39																	159.6	58.4	60.5	87.4											0.11					1
0				1			8		15.9	-0.6	29																	170.9	47.7	61.2	100.16											0.1					1
0				1			16.5		20.15	-0.65	61																	165.6	77.8	59.8	90.24											1.6					2
1				1			16		23.15	0.39	63.8																	189.7	71	57.4	118.1											0.28					1
0				1			16		23.01	0.28	63.8																	147	70	31	102											0.22					1
0				1			15.5		23.52	0.47	74.1																	122.4	81	28	78.2											0.01					1
1				1			7		16.9	0.12	29																	154.8	73.8	57.7	82.34											0.73					1
1				1			16.5		22.5	0.2	62																	133	80	32.9	84.1											0.99					1
1				1			7		15.61	-0.4	24																	175.5	96	62.6	93.7											1.27					2
1				1			14		22.39	0.43	59.5																	182	55	39.5	131.5											0.07					1
0				1			17		20.45	-0.57	64.8																	150	77.6	46	88.5											2.13					2
0				1			13.5		18.8	-0.6	42.3																	152	117.2	45.1	83.46											0.15					1
1				1			16.5		22.46	0.19	61.9																	133	80	32.9	84.1											0.99					1
0				1			14		21.25	-0.02	61.4																	139.3	51.8	42.3	86.6											0.26					1
1				1			12		18.97	-0.22	45																	181.1	99.1	49.3	112											0.95					1
1				1			11.5		20.81	0.38	46.2																	169	63.5	48.6	107.7											1.16					2
1				1			15		18.13	-0.85	44.7																	169.2	77	42	111.8											0.08					1
0				1			12		16.48	-0.98	36.1																	172.2	55.9	58.4	102.6											0.04					1
1				1			7		17.53	0.38	24																	139	89	56.3	64.9											0.24					1
0				1			11.5		18.94	-0.19	45.5																	191.9	71.1	42	135.7											0.63					1
1				1			11.5		19.95	0.13	46.4																	183	74	44.8	123.4											0.75					1
0				1			11.5		16.67	-0.83	37																	173	61.9	56	104.6											1.99					2
0				1			6		14.31	-1	22																	173.7	49.7	74.2	89.56											0.17					1
0				1			11.5		17.5	-0.6	34.8																	170.3	74.5	62.3	93.1											0.32					1
1				1			7		19.53	1.2	32																	158.8	84	46.9	95.1											2.34					2
1				1			15		18.13	-0.85	44.7																	169.2	77	42	111.8											0.08					1
0				1			17.5		19.76	-0.84	66.9																	142	72.8	30.8	96.6											1.09					2
1				1			6		14.6	-0.87	21																	169	66	55.3	100.5											0.63					1
[truncated: 2 more columns]
